# Supplementary material for: Plasticity of Drosophila germ granules during germ cell development
Source: PubMed Central journal article supplement (PMC10128949; doi:10.1371/journal.pbio.3002069), 2023-04-13
Supplement: pbio.3002069.s009.pdf [file pbio.3002069.s009.pdf]

**Fig 8B Uncropped Western Blot**

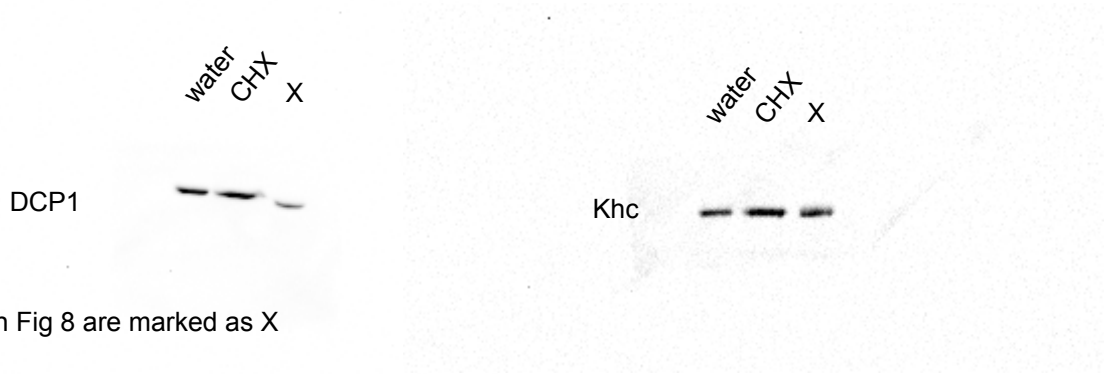

Lanes not included in Fig 8 are marked as X

**S5C Fig Uncropped Western Blot**

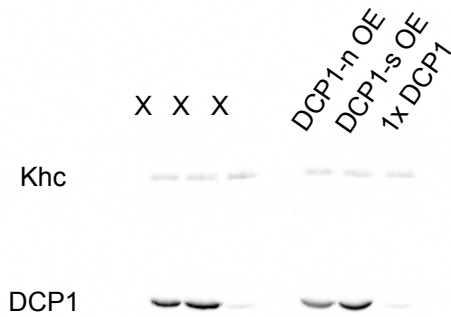

Lanes not included in S5 Fig are marked as X

**S6C Fig Uncropped Western Blot**

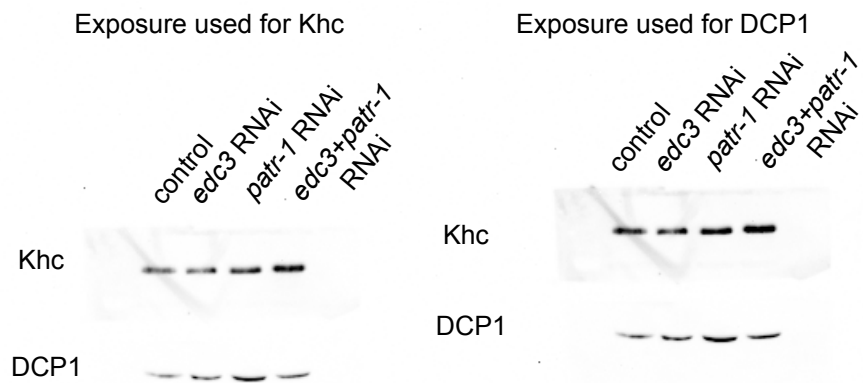

All images were captured using iBright FL 1000 Imaging System
